# Supplementary material
Source: publisher figshare collection journal article supplement (https://acs.figshare.com/ndownloader/files/4111237)

## Supporting Information

### Process Optimization of Aldol Type Reaction by Process Understanding Using *In situ* IR.

Shionogi & Co., Ltd.

Yuki Fukui,\* Hiroyuki Suzuki, Shinichi Oda, Toshikazu Hakogi, Yasunori  
Aoyama, Kitamura Hideyuki. Masayoshi Ogawa, Junko Kikuchi.

2009-6005-051-01  
in DMSO, 25°C

NMR chart of benzyl maltol (**2**). (500 MHz, DMSO- $d_6$ ).

**$^1\text{H}$**

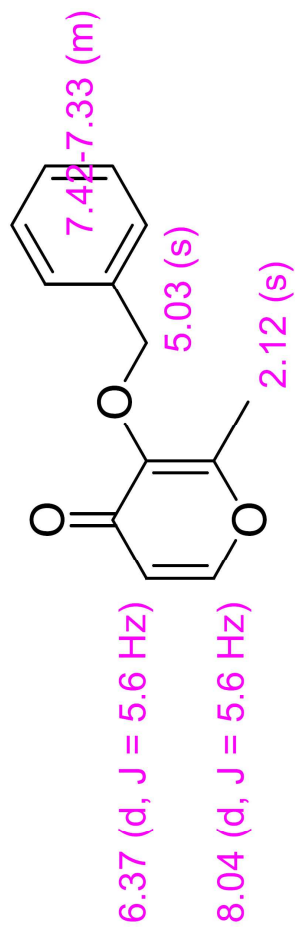

**$^{13}\text{C}$**

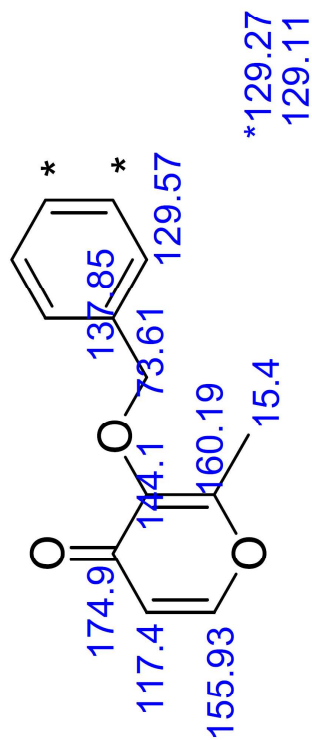

**HMBC**

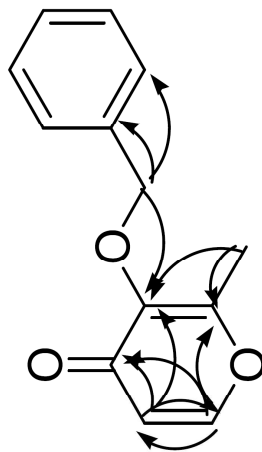

**<sup>1</sup>H**

2009-6005-051-01 (Y.Fukui)  
DMSO, 25.0C, INOVA-500  
sample ID: S-349572  
chartNo: 15HM1206147  
May 17 2012 by T.Sasaki  
Pulse Sequence: s2pul

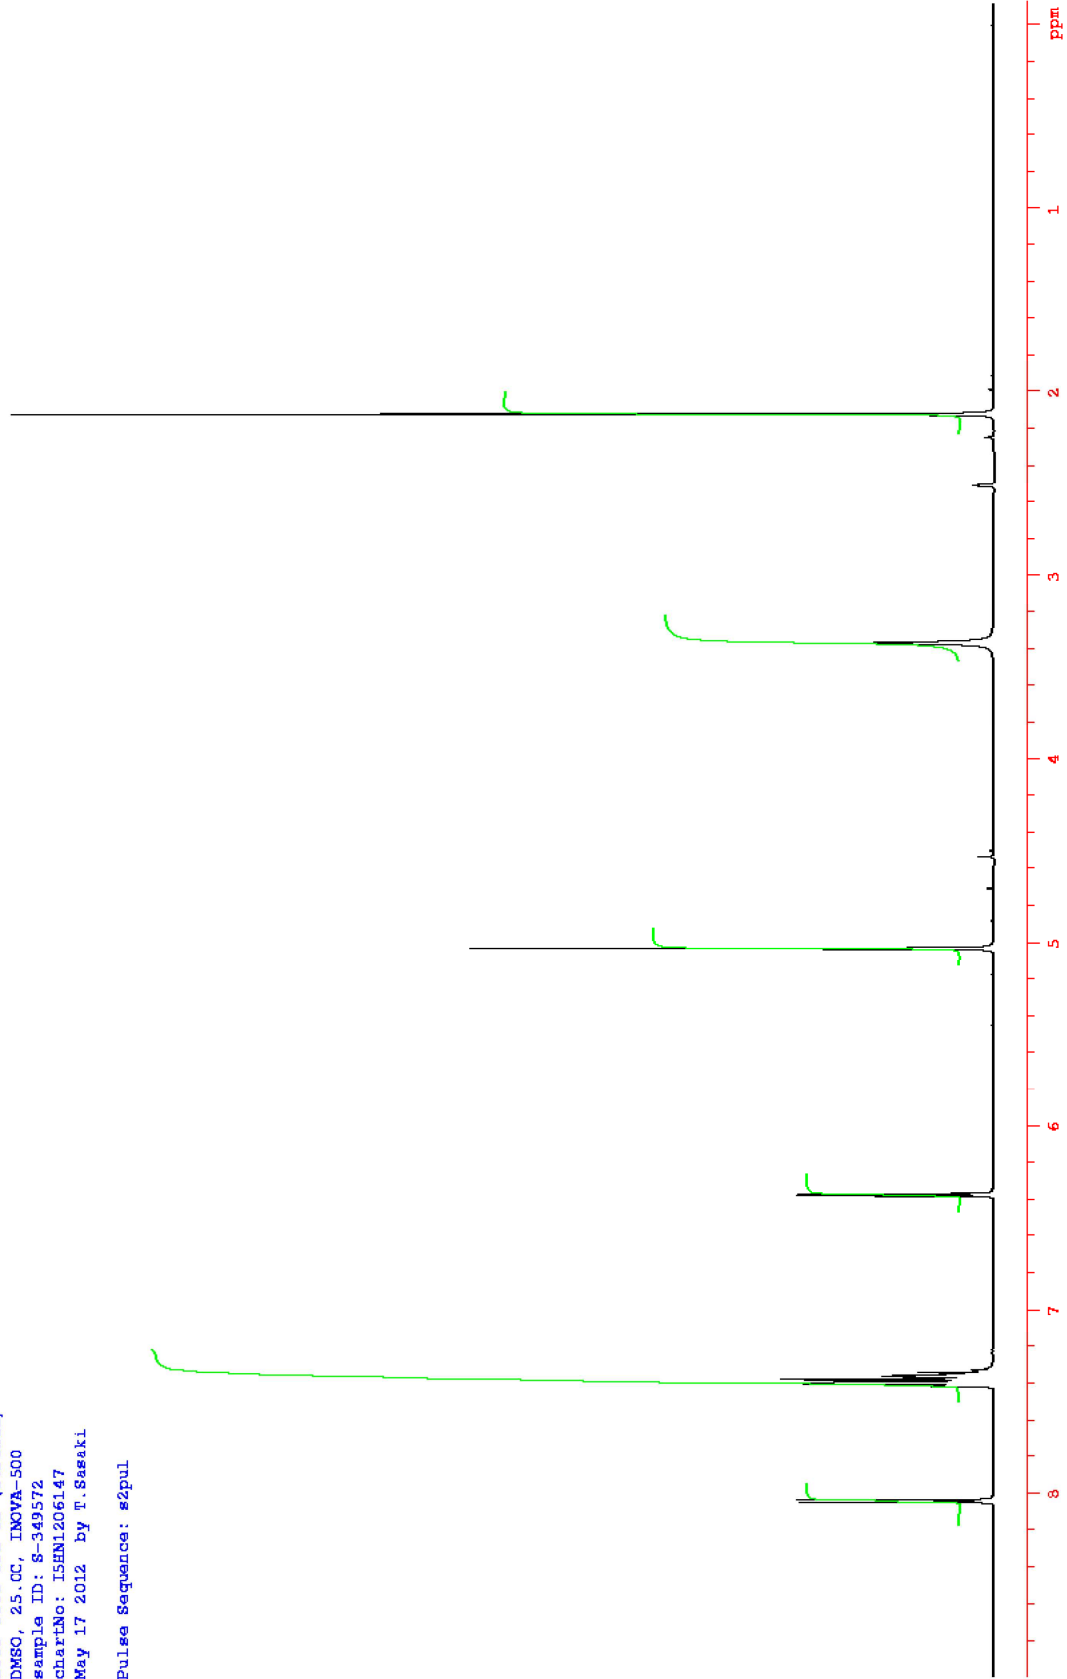

# 13C

2009-6005-051-01 (Y.Fukui)  
DMSO, 25.0C, INOVA-500  
#sample ID: S-349572  
chartNo: ISXN1201846  
May 15 2012 by T.Sasaki  
Pulse Sequence: s2pul

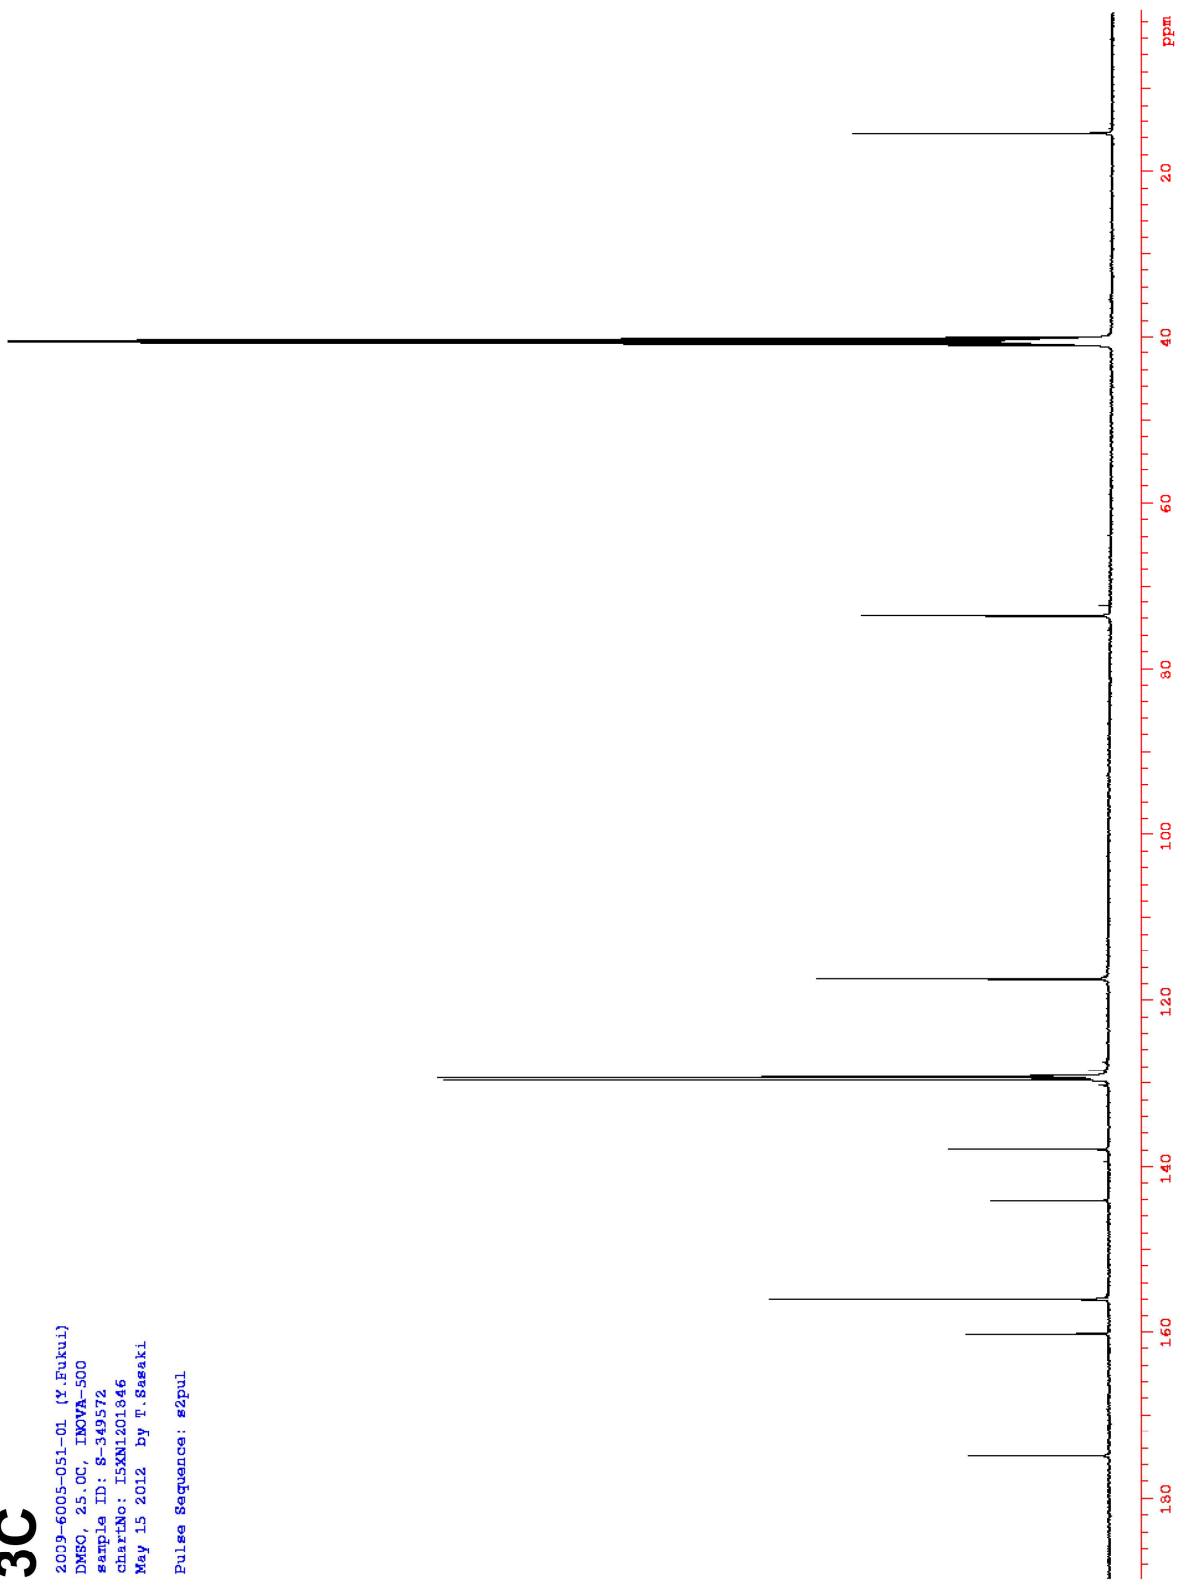

# COSY

2009-6005-051-01 (Y.Fukui)  
DMSO, 25.0C, INOVA-500  
sample ID: S-349572  
chartNo: I5HS1202148  
May 15 2012 By T.Sasaki

exp13 gcOSY

| SAMPLE         |                     | FLAGS    |    |
|----------------|---------------------|----------|----|
| date           | May 15 2012         | hs       | nn |
| solvent        | DMSO                | sepu     | n  |
| sample         | 2009-6005-0- hsglvl | 2500     |    |
| 51-01 SPECIAL  |                     |          |    |
| ACQUISITION    | temp                | 25.0     |    |
| sw             | 3400.2 gain         | 34       |    |
| at             | 0.151 spin          | not used |    |
| np             | 1024 F2 PROCESSING  |          |    |
| fb             | not used sb         | 0.075    |    |
| ss             | 16 sbs              | not used |    |
| d1             | 1.000 fn            | 2048     |    |
| nt             | 2 F1 PROCESSING     |          |    |
| 2D ACQUISITION | sb1                 | 0.038    |    |
| sw1            | 3400.2 sbw1         | not used |    |
| ni             | 256 fn1             | 2048     |    |
| TRANSMITTER    |                     |          |    |
| tn             | H1 sp               | 826.6    |    |
| sfirg          | 499.744 wp          | 3396.9   |    |
| tof            | 11.6 spl            | 828.2    |    |
| tpwr           | 49 wpl              | 3396.9   |    |
| pw             | 9.800 rfl           | -823.3   |    |
| GRADIENTS      |                     |          |    |
| gzlwl1         | 2500 rfp            | 0        |    |
| gtl            | 0.001000 rfp1       | -824.9   |    |
| qstab          | 0.000500            |          |    |
| DECOUPLER      |                     |          |    |
| dn             | H1 sc               | 160.0    |    |
| dm             | nnn wc2             | 120.0    |    |
|                | sc2                 | 0        |    |
|                | vs                  | 65       |    |
|                | th                  | 5        |    |
|                | ai                  | av       |    |

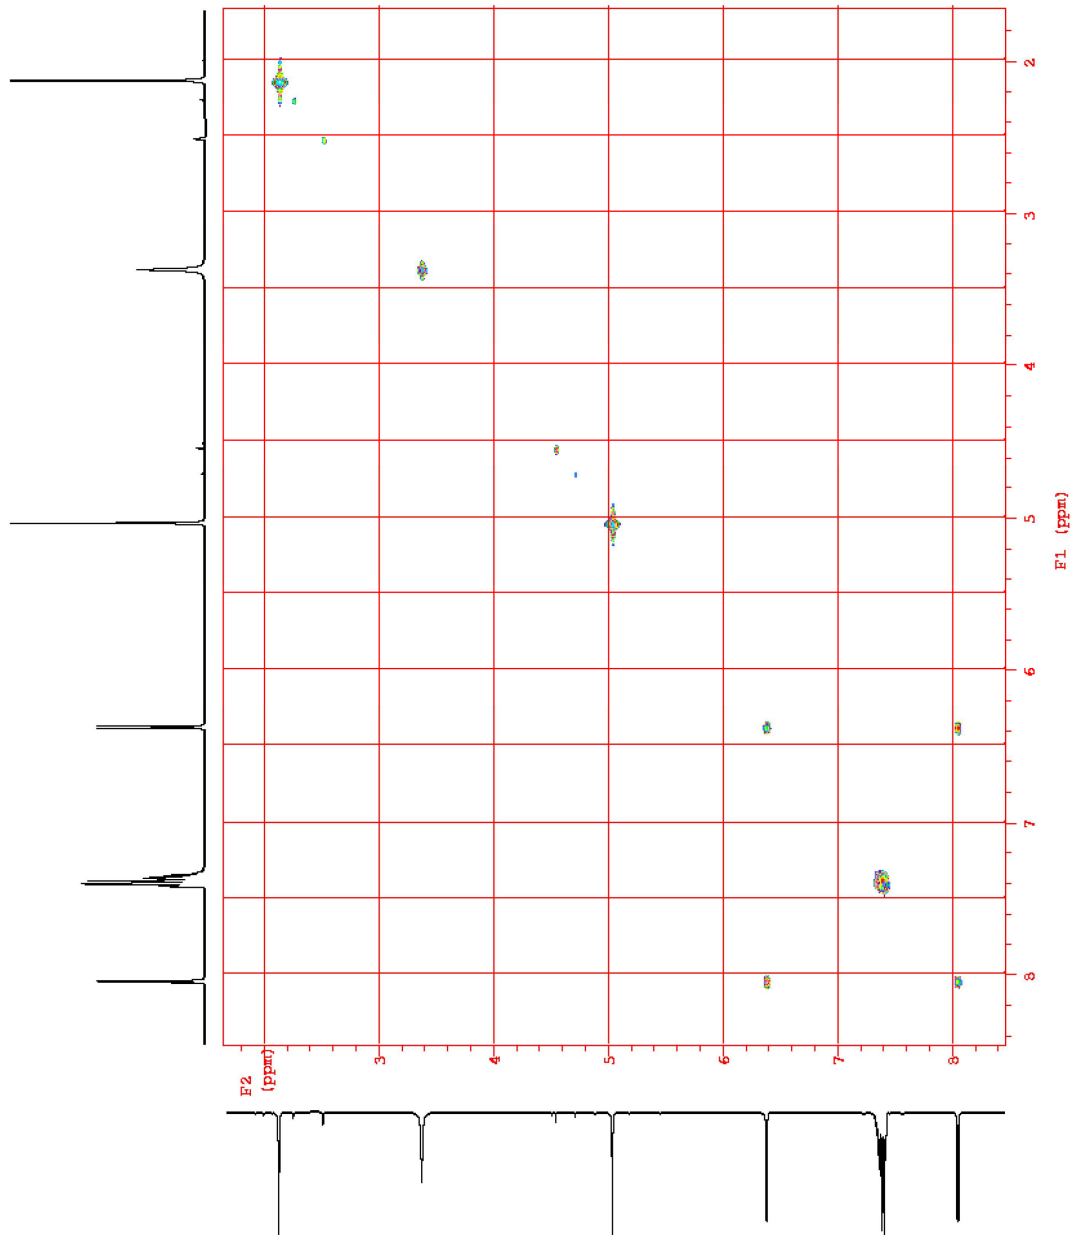

# HSQC

2009-6005-051-01 (Y.Fukui)  
DMSO, 25.0C, INOVA-500  
sample ID: S-349572  
chartNo: ISX81203532  
May 15 2012 by T.Sasaki  
exp14 gHSQC

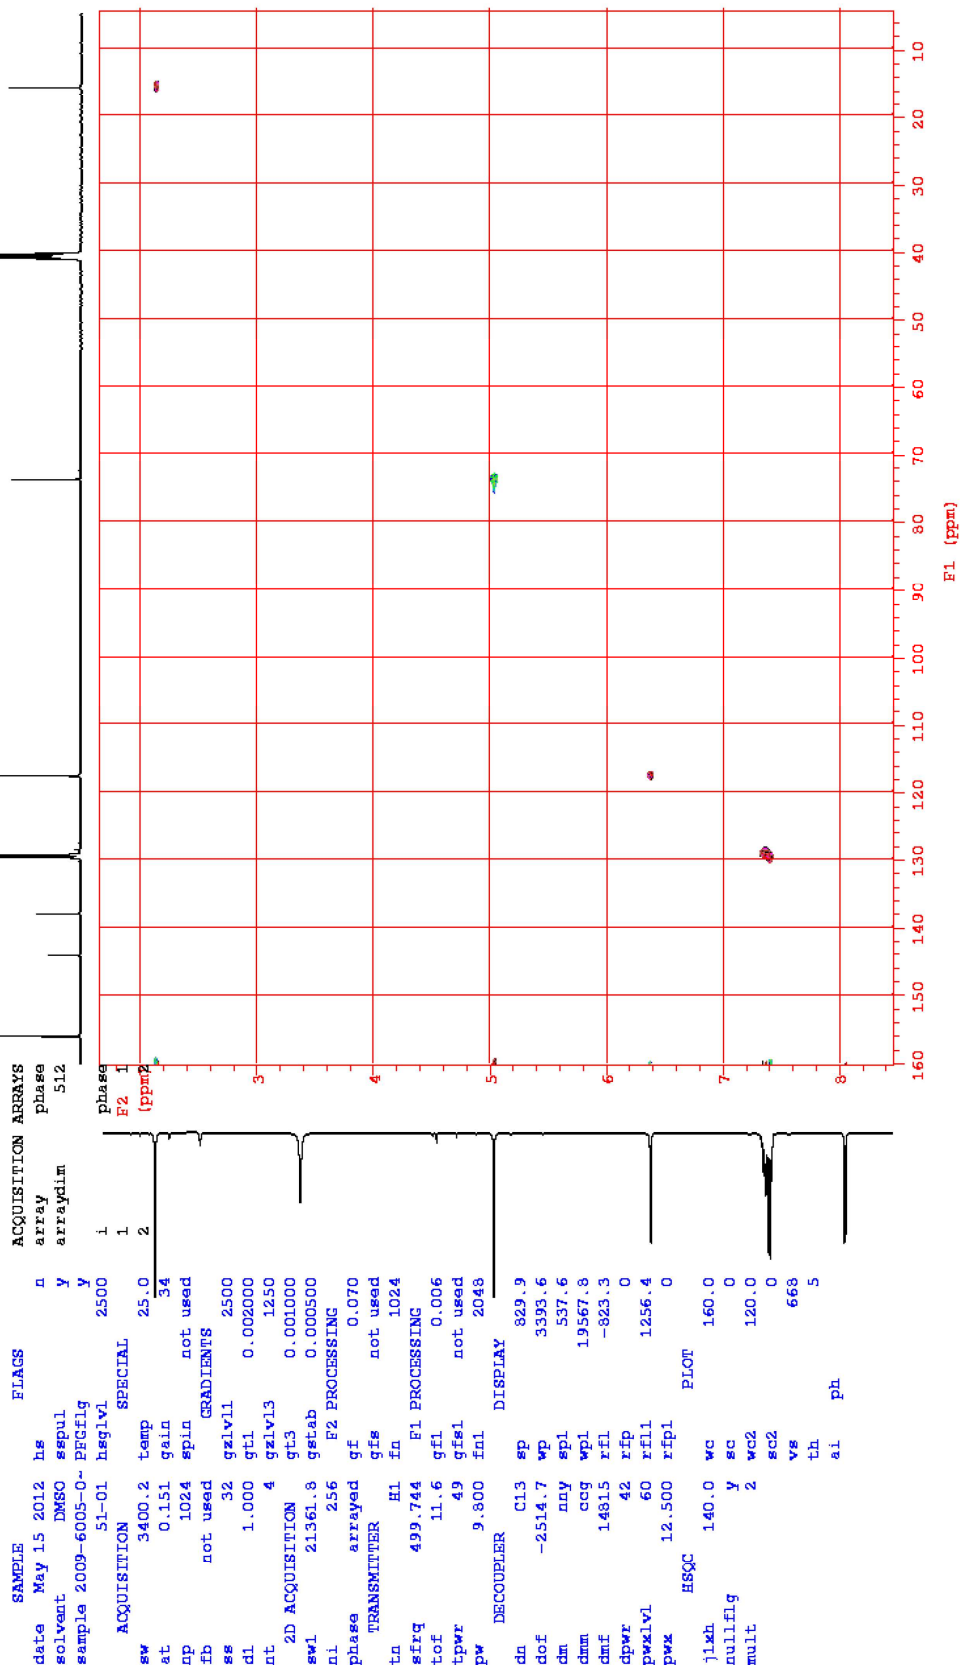

2009-6005-051-01 (Y.Fukui)  
DMSO, 25.0C, INOVA-500  
sample ID: S-349572  
chartNo: I5XS1203533  
May 15 2012 by T.Sasaki

exp15 aHMC

| SAMPLE         |              |               |          | FLAGS    |   |   |   |
|----------------|--------------|---------------|----------|----------|---|---|---|
| date           | May 15 2012  | hs            | sspl     | n        | n | y | n |
| solvent        | DMSO         |               |          |          |   |   |   |
| sample         | 2009-6005-0- | PEFfg         |          |          |   |   |   |
|                | 51-01        | hsplv1        | 2500     |          |   |   |   |
| ACQUISITION    |              |               |          | SPECIAL  |   |   |   |
| sw             | 3400.2       | temp          | 25.0     |          |   |   |   |
| at             | 0.151        | gain          | 54       |          |   |   |   |
| np             | 1024         | spin          | not used |          |   |   |   |
| fb             | not used     | GRADIENTS     |          |          |   |   |   |
| ss             | 32           | gzvlv1        | 2500     |          |   |   |   |
| d1             | 1.500        | gt1           | 0.001000 |          |   |   |   |
| nt             | 8            | gzlv13        | 1250     |          |   |   |   |
| 2D ACQUISITION |              |               |          |          |   |   |   |
| sw1            | 28901.7      | gstab         | 0.001000 |          |   |   |   |
| ni             | 256          | f2 processing | 0.000500 |          |   |   |   |
| phase          | 0            | sb            | 0.075    |          |   |   |   |
| TRANSMITTER    |              |               |          | not used |   |   |   |
| tn             | H1           | fn            | 2043     |          |   |   |   |
| sfreq          | 499.744      | F1 PROCESSING |          |          |   |   |   |
| tof            | 11.6         | sbl           | 0.004    |          |   |   |   |
| tpwr           | 49           | sbvl          | not used |          |   |   |   |
| pw             | 9.800        | fn1           | 2043     |          |   |   |   |
| DECOUPLER      |              |               |          | DISPLAY  |   |   |   |
| dn             | C13          | sp            | 826.6    |          |   |   |   |
| dof            | 1893.4       | wp            | 3396.9   |          |   |   |   |
| dn             | nan          | sp1           | -600.0   |          |   |   |   |
| dnn            | ccp          | wp1           | 23873.5  |          |   |   |   |
| dnnf           | 14815        | rfl           | -823.3   |          |   |   |   |
| dnpw           | 42           | rfp           | 0        |          |   |   |   |
| pwslvl         | 57           | rfl1          | 623.3    |          |   |   |   |
| pwk            | 18.500       | rflp1         | 0        |          |   |   |   |
| HMEC           |              |               |          | PLOT     |   |   |   |
| j1xh           | 140.0        | wc            | 160.0    |          |   |   |   |
| jnxh           | 8.0          | sc            | 0        |          |   |   |   |
|                |              | wc2           | 120.0    |          |   |   |   |
|                |              | sc2           | 0        |          |   |   |   |
|                |              | vs            | 63       |          |   |   |   |
|                |              | th            | 10       |          |   |   |   |
|                |              | ai            | av       |          |   |   |   |

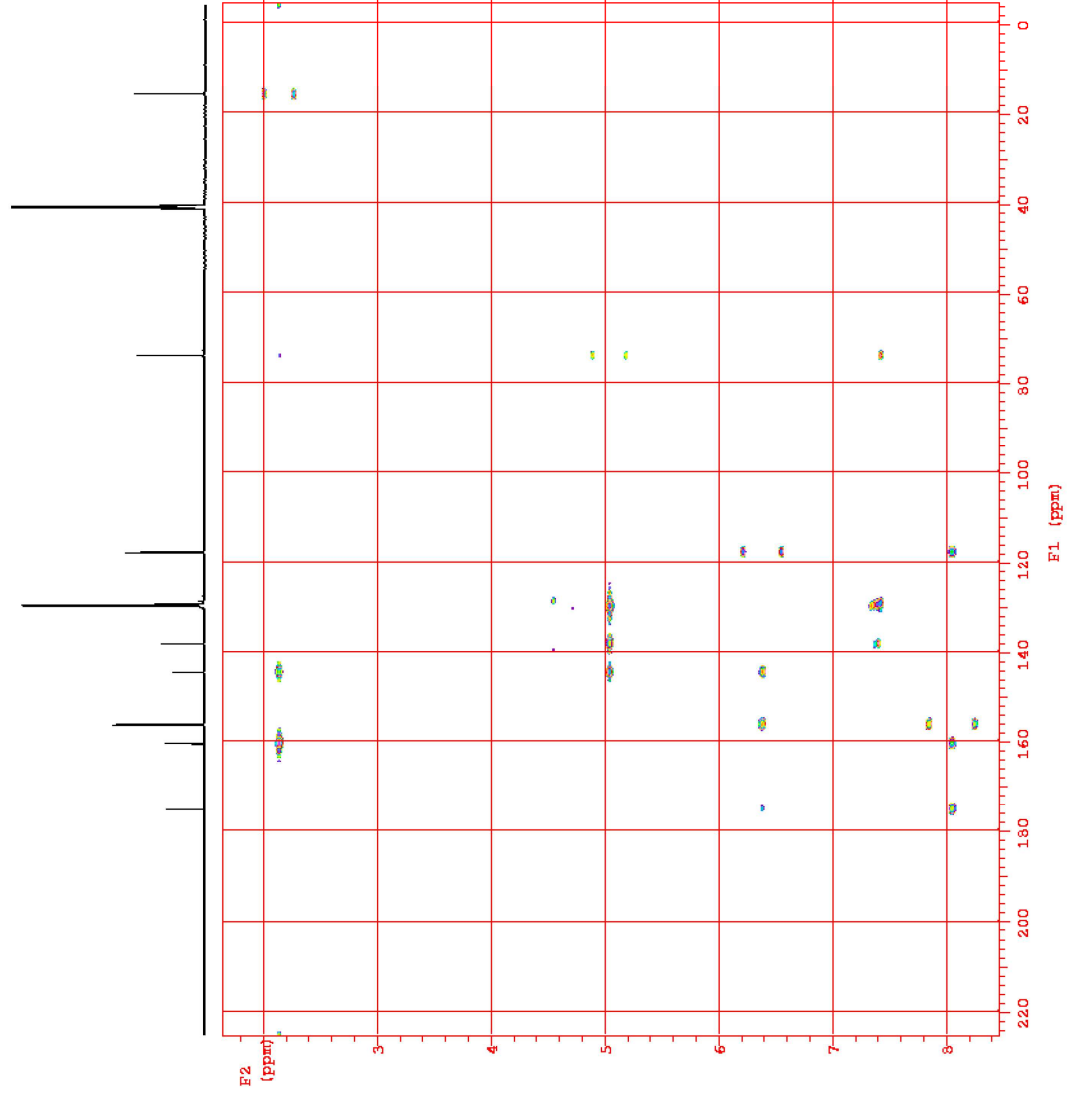

NMR chart of 3-(benzyloxy)-2-(2-hydroxy-2-phenylethyl)-4H-pyran-4-one (4)



2006-6080-094-01  
In DMSO, 25°C

**<sup>1</sup>H**

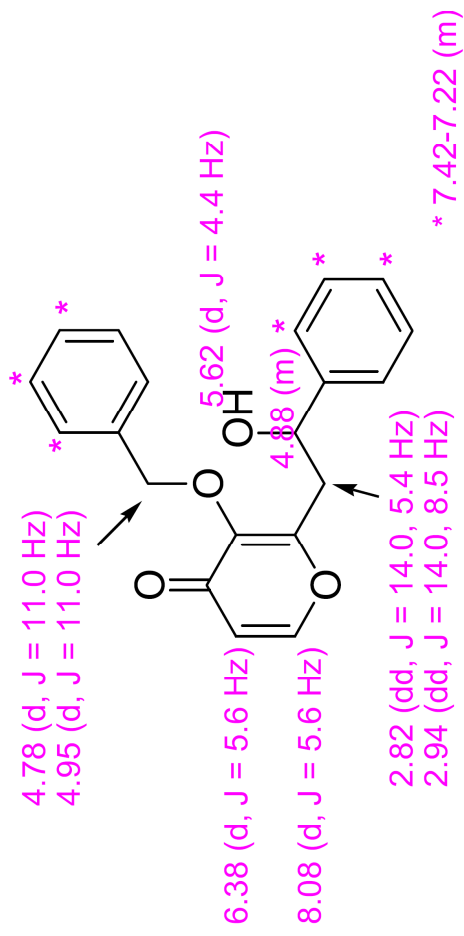

**13C**

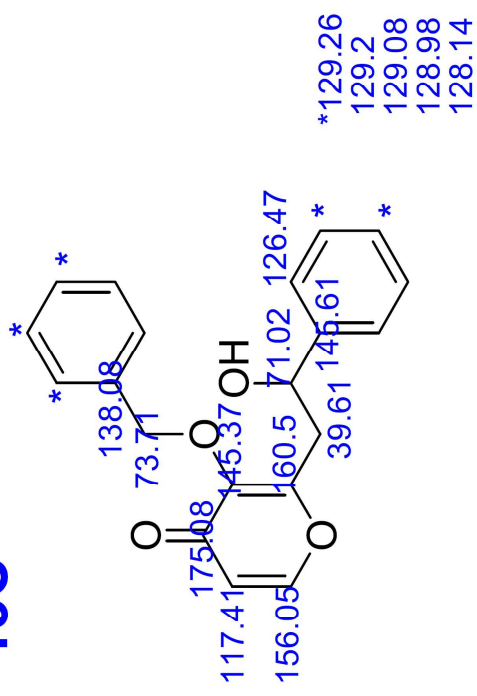

**HMBC**

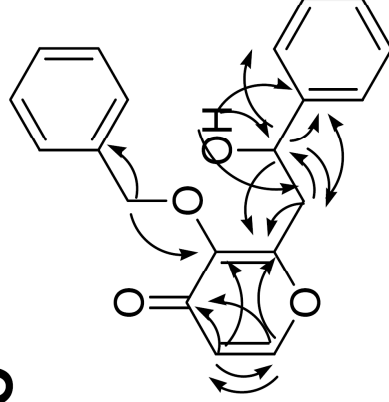

**$^1\text{H}$**

2006-6080-094-01 (Y.Fukui)  
DMSO, 25.0C, INOVA-500  
sample ID: S-349572  
chartNo: ISEN1206145  
May 15 2012 by T.Sasaki  
Pulse Sequence: szpul

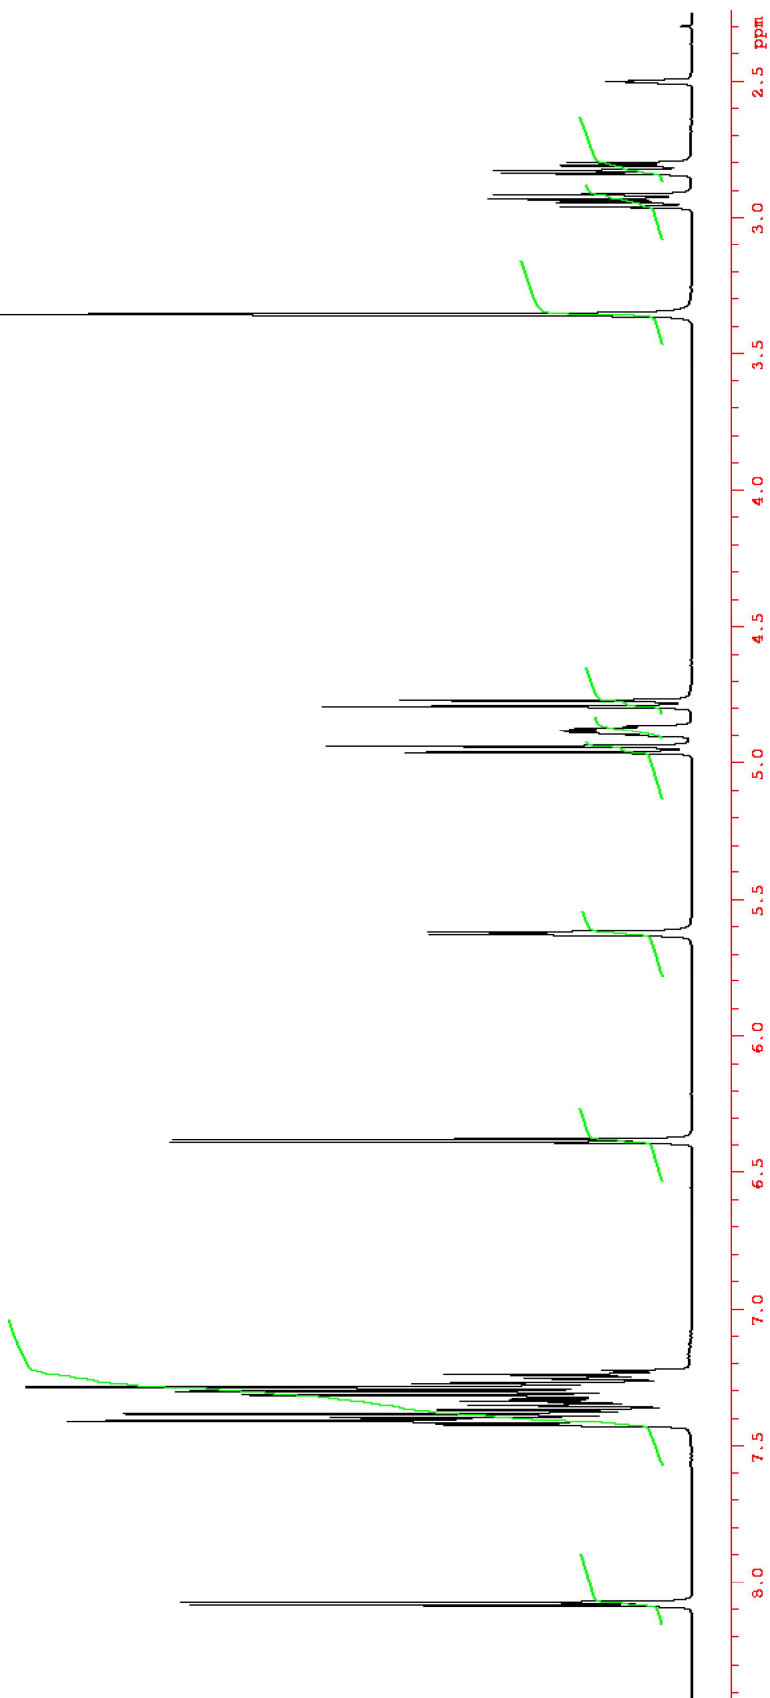

# 13C

2006-6030-094-01 (Y.Fukui)  
DMSO, 25.0C, INOVA-500  
sample ID: S-349572  
charNo: I5XN1201848  
May 17 2012 by T.Sasaki

Sample directory: 2006-6030-094-01

Pulse Sequence: s2pul

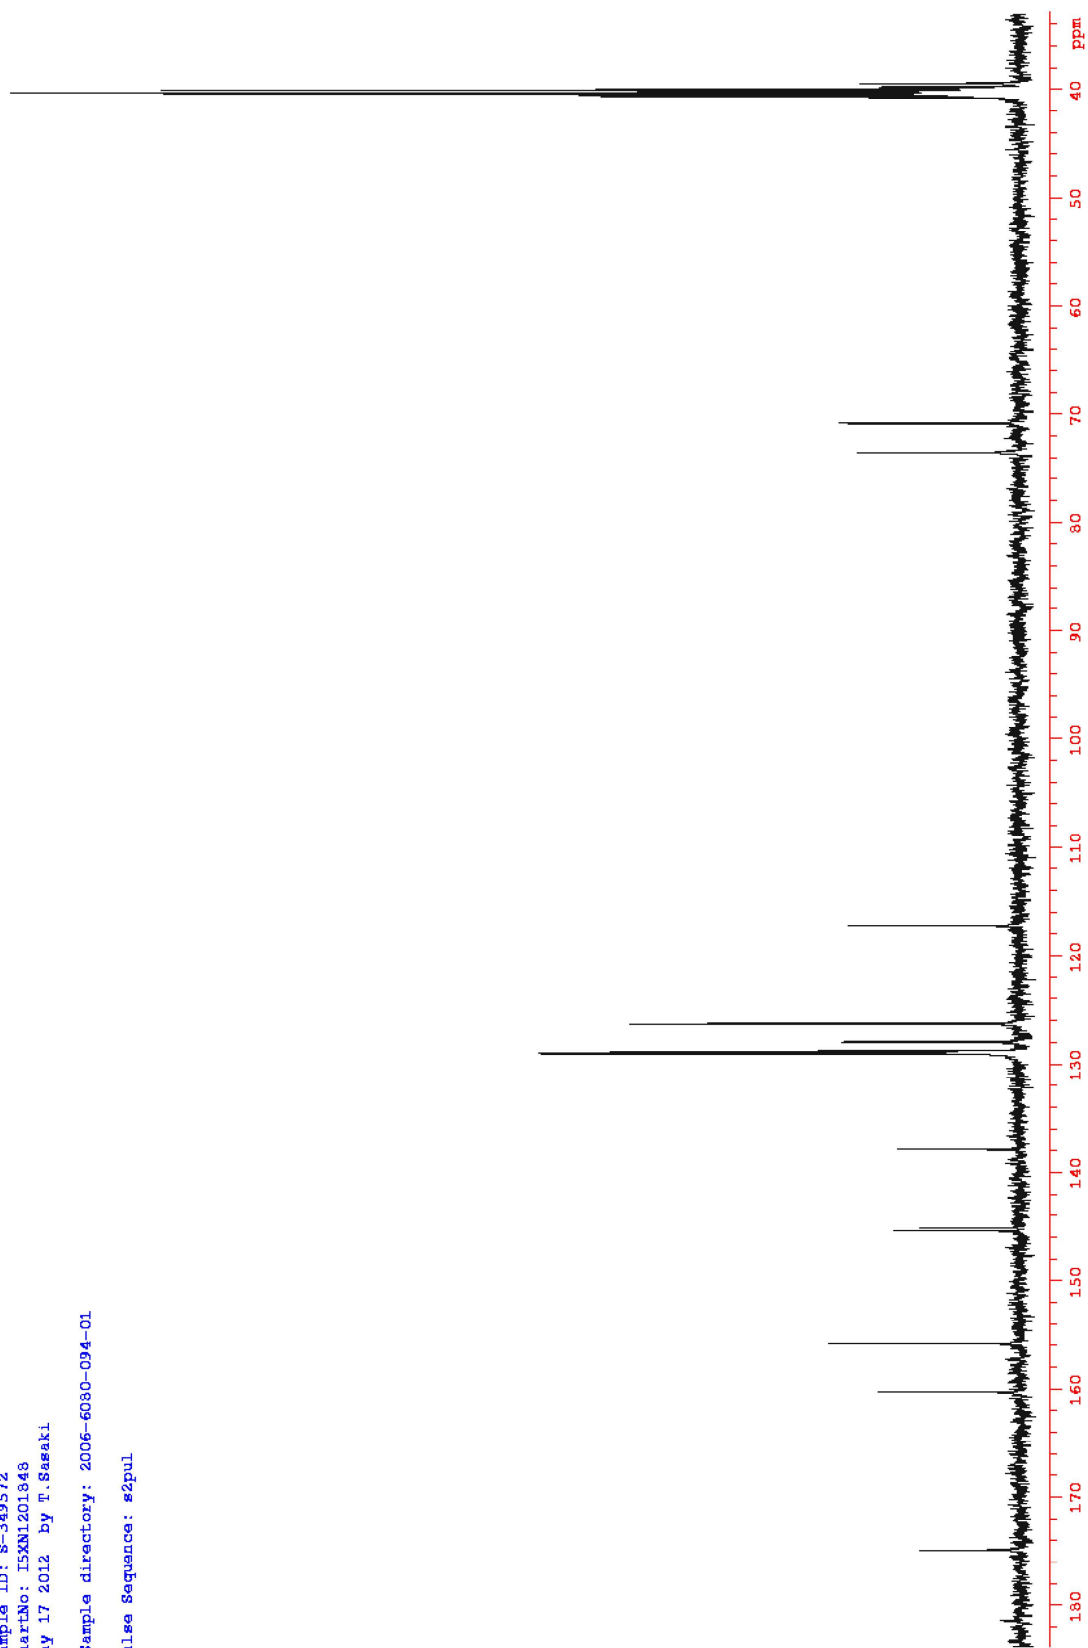

# 13C

2006-6030-094-01 (Y.Fukui)  
DMSO, 25.0C, INOVA-500  
sample ID: S-349572  
charNo: I5XN1201848  
May 17 2012 by T.Sasaki

Sample directory: 2006-6030-094-01

Pulse Sequence: s2pul

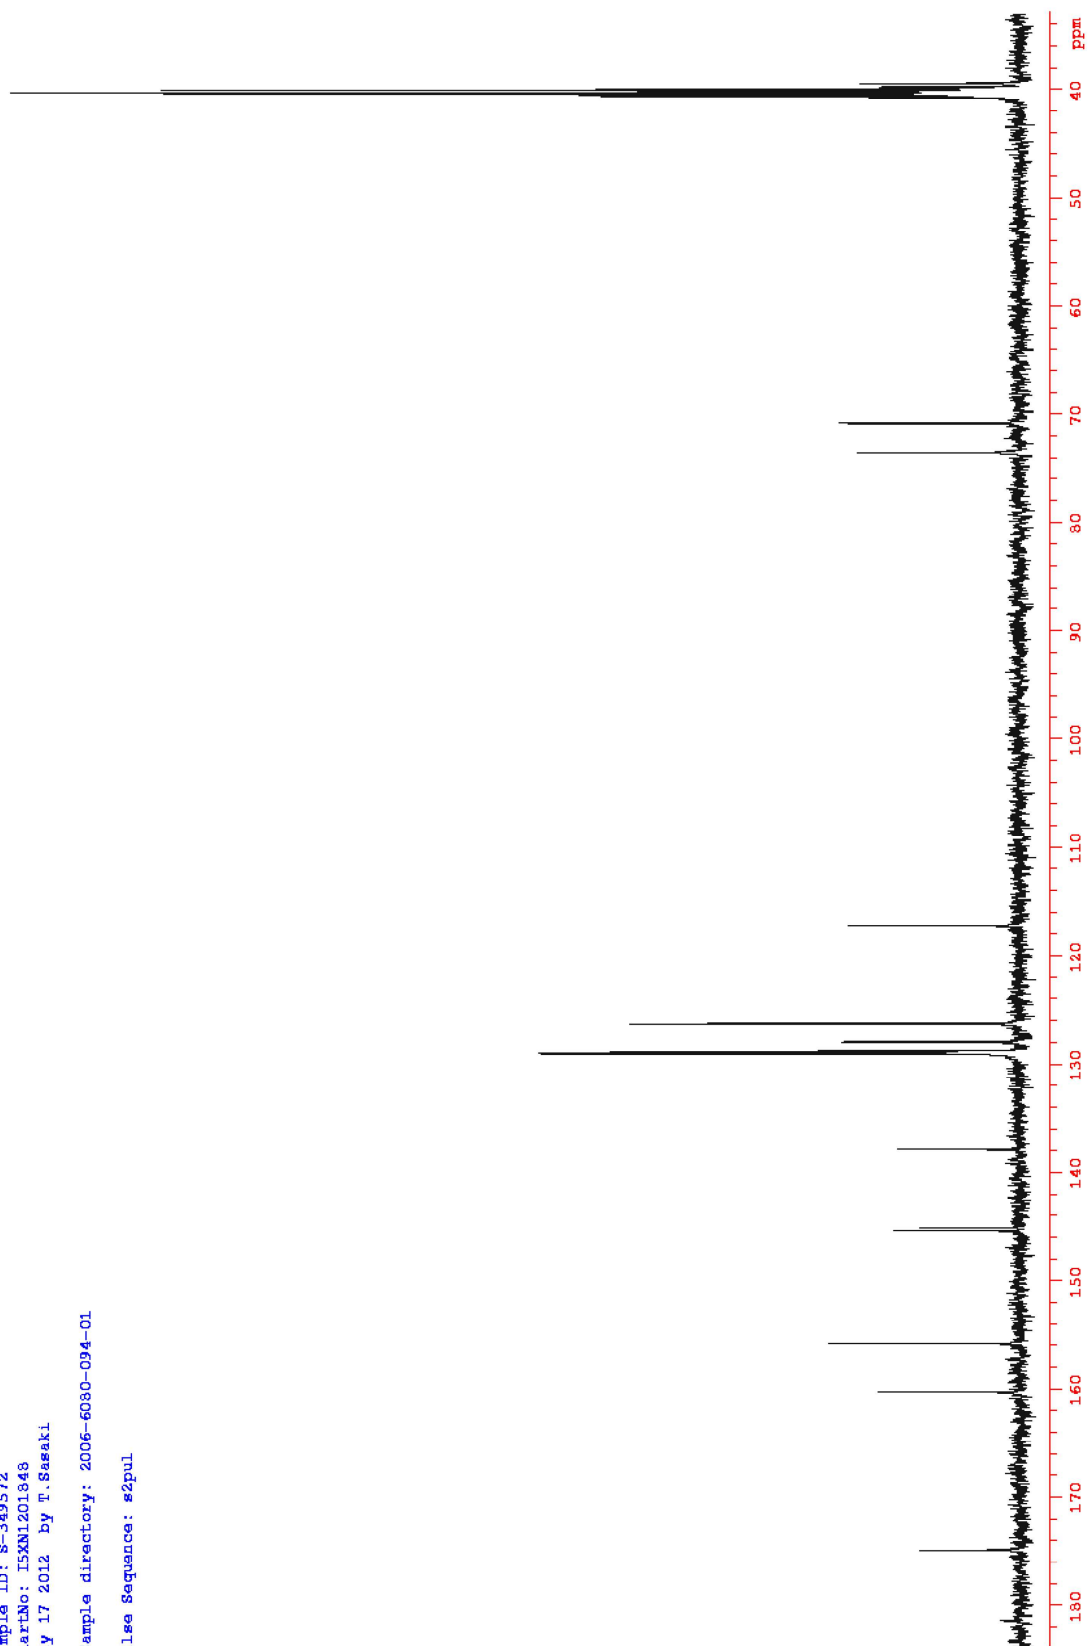

# HSQC

2006-6080-094-01 (Y.Fukui)  
DMSO, 25.0C, INOVA-500  
sample ID: 8-349572  
chartNo: ISX81203530  
May 15 2012 by T.Sasaki

exp9 gHSQC

| SAMPLE              |              | FLAGS         |          | ACQUISITION ARRAYS |       |
|---------------------|--------------|---------------|----------|--------------------|-------|
| date                | May 15 2012  | hs            |          | array              | phase |
| solvent             | DMSO         | sspul         | y        | arraydim           | 512   |
| sample              | 2006-6080-0- | PEGflg        | y        |                    |       |
| 94-01 hsglvt 2500   |              |               |          |                    |       |
| ACQUISITION SPECIAL |              |               |          |                    |       |
| sw                  | 4278.1       | temp          | 25.0     | 1                  | 1     |
| at                  | 0.239        | gain          | 32       | 2                  |       |
| np                  | 2048         | spin          | not used |                    |       |
| fb                  | not used     | GRADIENTS     |          |                    |       |
| ss                  | 32           | gzlvt1        | 2500     |                    |       |
| dl                  | 1.000        | gt1           | 0.002000 |                    |       |
| nt                  | 4            | gzlvt3        | 1250     |                    |       |
| 2D ACQUISITION      |              |               |          |                    |       |
| sw1                 | 21361.8      | gstab         | 0.001000 |                    |       |
| ni                  | 256          | F2 PROCESSING | 0.000500 |                    |       |
| phase               | arrayed      | gf            | 0.111    |                    |       |
| TRANSMITTER         |              |               |          |                    |       |
| tn                  | H1           | fn            | 2048     |                    |       |
| sfreq               | 499.743      | F1 PROCESSING |          |                    |       |
| tof                 | -470.8       | gfl           | 0.006    |                    |       |
| tpwr                | 49           | gfsl          | not used |                    |       |
| pw                  | 9.825        | fn1           | 2048     |                    |       |
| DECOUPLER           |              |               |          |                    |       |
| dn                  | C13          | sp            | 1056.1   |                    |       |
| dof                 | -2514.7      | wp            | 3041.4   |                    |       |
| dm                  | any          | spl           | 4271.8   |                    |       |
| dmm                 | cog          | wpl           | 12662.7  |                    |       |
| dmf                 | 14815        | rfl           | 101.2    |                    |       |
| dpr                 | 42           | rfp           | 0        |                    |       |
| pxlvt               | 60           | rfl1          | 1256.4   |                    |       |
| pw                  | 12.500       | rfl1          | 0        |                    |       |
| PLOT                |              |               |          |                    |       |
| j1kh                | 140.0        | wc            | 160.0    |                    |       |
| nullflg             | y            | sc            | 0        |                    |       |
| mult                | 2            | wc2           | 120.0    |                    |       |
|                     |              | sc2           | 0        |                    |       |
|                     |              | vs            | 156      |                    |       |
|                     |              | th            | 4        |                    |       |
|                     |              | ai            |          |                    |       |
|                     |              | ph            |          |                    |       |

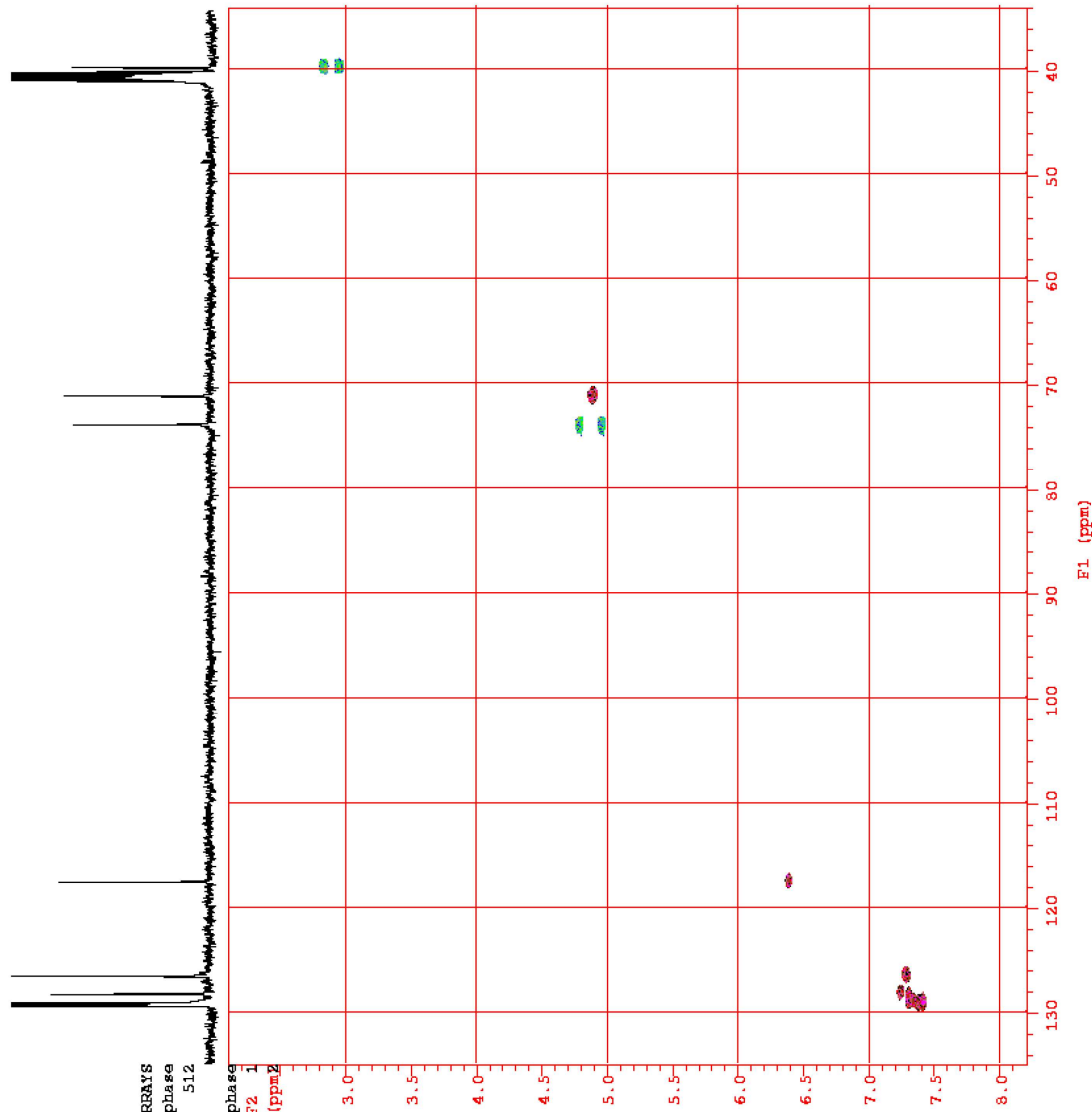

# HMBC

2006-6080-094-01 (Y.Fukui)  
 DMSO, 25.0C, INOVA-500  
 sample ID: 8-349572  
 chartNo: ISXSI203531  
 May 15 2012 by T.Sasaki  
 exp10 gHMBC

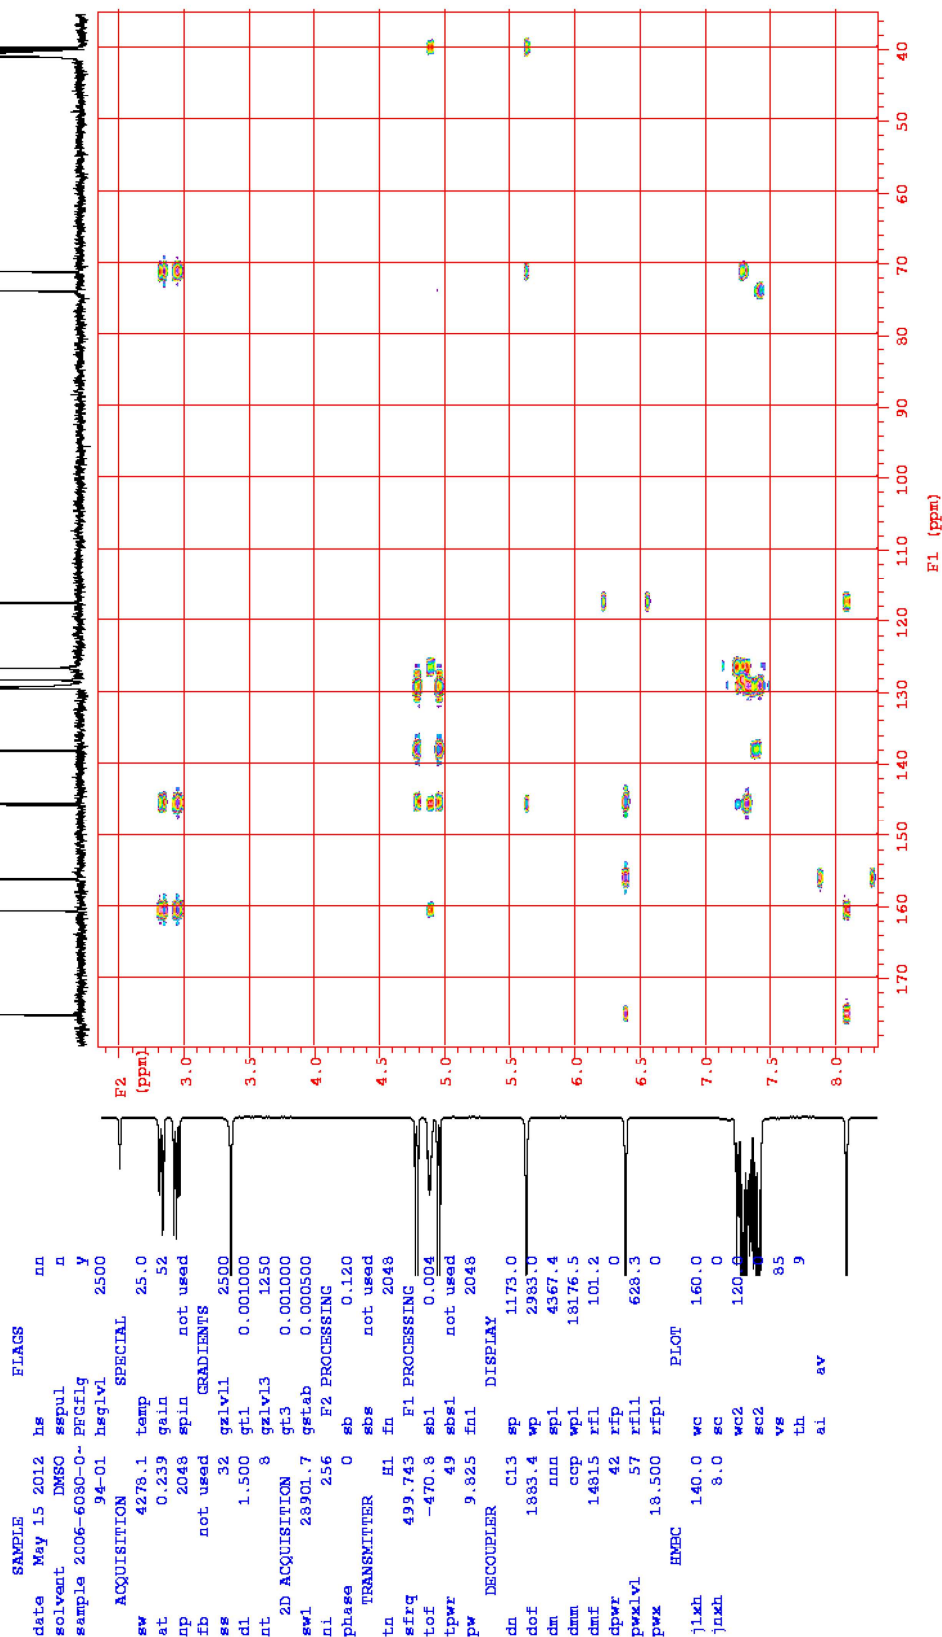

### Experimental procedure. (Observation of addition of **3** to LHMDS. Figure 3)

In a four-neck flask equipped with in-situ IR censor (Mettler Toledo ReactIR™ iC10.), LHMDS (20% in THF, Ethylbenzene, 39.8 g, 47.6 mmol, 1 equiv.) was mixed with THF (58 mL) under nitrogen atmosphere and the mixture was cooled to -70 degree. Then **3** (10.1 g, 95.2 mmol, 2 equiv.) was added dropwise to the mixture at the same condition.

**Figure 3.** Observation of addition of **3** to LHMDS.

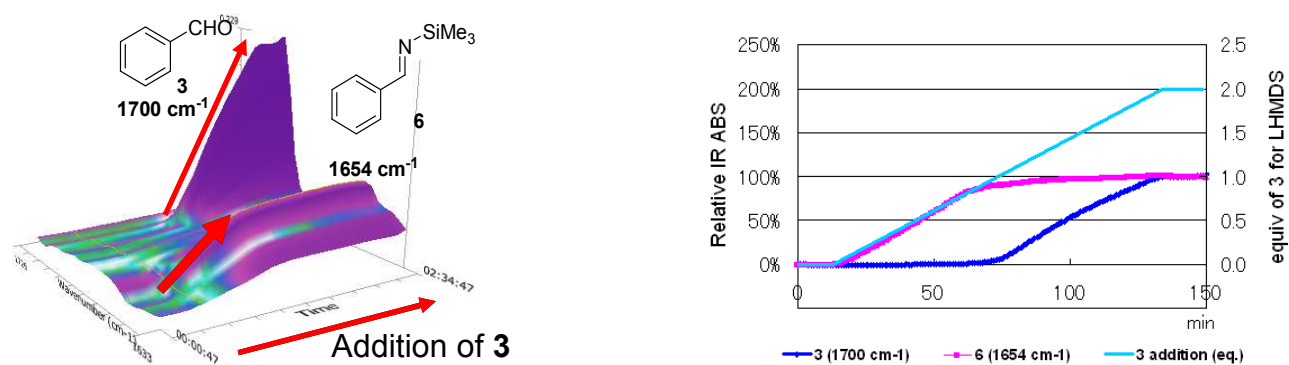

### Experimental procedure (Observation of addition of LHMDS to **3**. Figure 5.)

In a four-neck flask equipped with in-situ IR censor (Mettler Toledo ReactIR™ iC10.), **3** (5.05 g, 47.6 mmol, 1 equiv.) was mixed with THF (58 mL) under nitrogen atmosphere and the mixture was cooled to -70 degree. Then LHMDS (20% in THF, Ethylbenzene, 39.8 g, 47.6 mmol, 1 equiv.) was added dropwise to the mixture at the same condition.

**Figure 5.** Observation of addition of LHMDS to **3**.

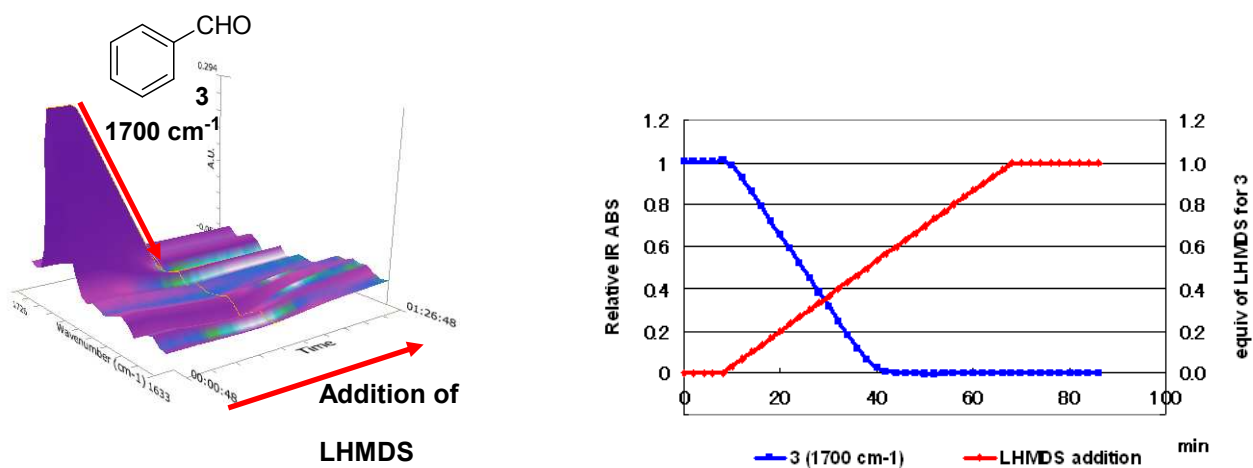



### Information for complex 7.

$^1\text{H}$ -NMR analysis was carried out in THF- $d_6$  at -46 degree. NMR spectra were measured on a 400 MHz Agilent 400-MR spectrometer. Complete structure determination of complex **7** was not achieved because the complex easily decomposed into benzaldimine **6**. However some chemical shifts which correspond to acetal and hemi-acetal of the complex were detected (see following experimental procedure.). Therefore there is no solid evidence. However there are many circumstance evidences which prove it.

To be specific,

1, Carbonyl peak of **3** completely disappeared and there is no peak at 1630-1720  $\text{cm}^{-1}$  as shown in figure 5 (left). The fact indicates that there is no carbon-hetero atom double bond compounds in the reaction mixture.

2, The complex can reverse to **3** by water addition. The fact indicates that the complex has easily broken bond. Considering the components of the reaction mixture (**3**, LHMDs and THF), the bond should be O-C-O acetal and/or O-C-N hemi-acetal.

3, There is no reaction point except for carbonyl group of **3** and Nitrogen atom of LHMDs.

4, Reaction ratio of **3** and LHMDs is 2:1 as shown in figure 5 (right).

Considering those four conditions, it is speculated that complex **7** was formed. And following NMR data indicates that the complex seems to have some conformations.

### Experimental procedure for NMR analysis of complex 7.

**3** (202  $\mu$ L, 1.982 mmol, 1 equiv.) was mixed with THF (3 mL) under nitrogen atmosphere and the mixture was cooled to -70 degree. Then LHMDs (20% in THF, Ethylbenzene, 37  $\mu$ L, 0.198 mmol, 0.1 equiv.) was added and stirred for 5 minutes. One drop of the mixture was added to THF- $d_6$  (0.75 mL) in NMR tube at -70 degree under nitrogen atmosphere. Then the diluted sample was quickly set into NMR spectrometer and analysis was carried out at -46 degree.

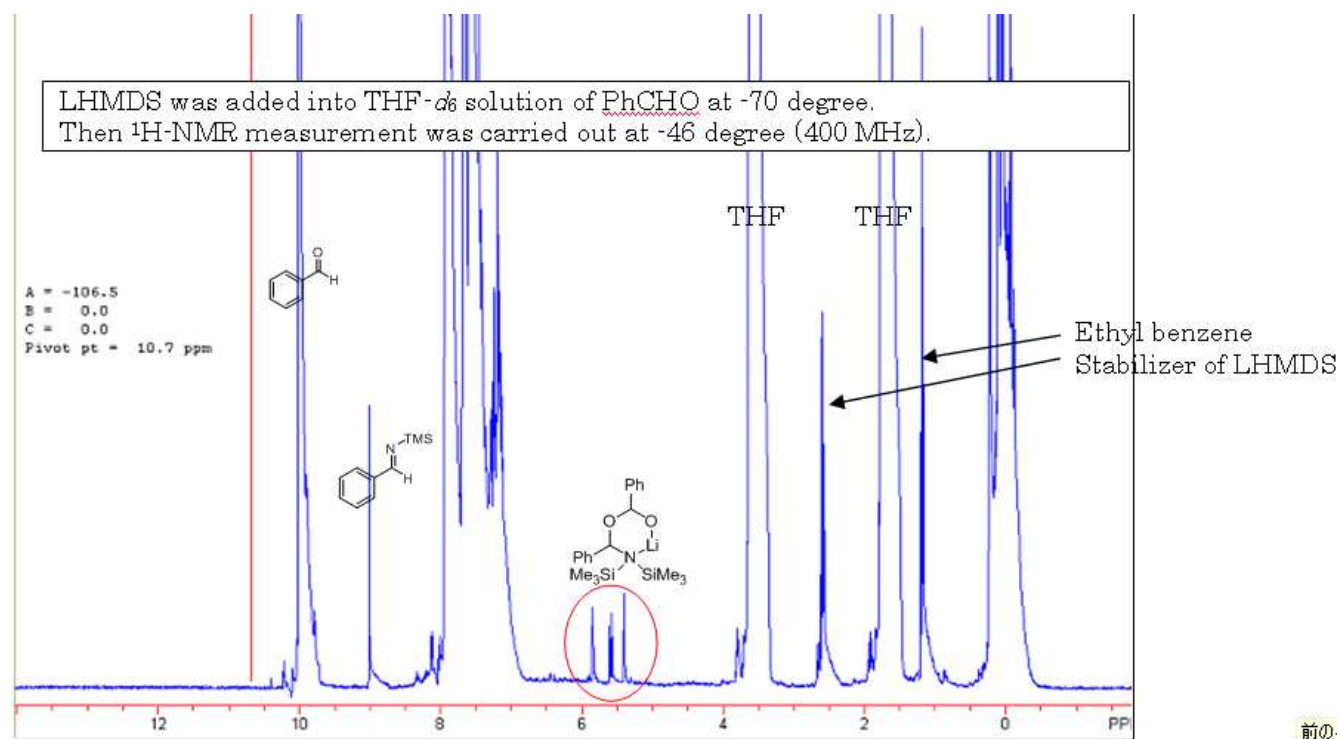

Supplement: Supplementary file 1 [file 4111237]
